# Supplementary material for: Alternating Hemiplegia of Childhood: Retrospective Genetic Study and Genotype-Phenotype Correlations in 187 Subjects from the US AHCF Registry
Source: PLOS journal article supplement (doi:10.1371/journal.pone.0127045), 2015-05-21
Supplement: S2 (10.1371/journal.pone.0127045.s002) [file journal.pone.0127045.s002]

**S2\_Table: D801Y and R756H associated phenotypes.** Summary of the clinical informations from the patients presenting the D801Y and the R756H mutations

|                                  | <b>Patient presenting the D801Y mutation</b>                                                                                                                                                                                                                                                                                                                                                                                                                                |
|----------------------------------|-----------------------------------------------------------------------------------------------------------------------------------------------------------------------------------------------------------------------------------------------------------------------------------------------------------------------------------------------------------------------------------------------------------------------------------------------------------------------------|
|                                  | Male, 32years old.                                                                                                                                                                                                                                                                                                                                                                                                                                                          |
| <b>Birth</b>                     | Normal                                                                                                                                                                                                                                                                                                                                                                                                                                                                      |
| <b>Development</b>               | Motor milestones and speech acquisition normal<br><br>At 14 months: episodes of fine tremor of the extremities                                                                                                                                                                                                                                                                                                                                                              |
| <b>Childhood and Adolescence</b> | Recurrent episodes of right or left sided hemiplegia, induced by excitement or fear, usually preceded by severe headaches and associated with dystonia,<br><br>Less frequent episodes of quadriplegia<br><br>No effect of Flunarizine nor Inderal<br><br><br><br>Between the spells: Ataxia, right hemiparesia, right sided athetosis not improved by Sinemet, fluctant dysarthria, abnormal eye movements<br><br><br><br>Mental development: IQ=123 at 4y3M and 92 at 12yo |
| <b>At 30 yo</b>                  | First seizure (Grand Mal)                                                                                                                                                                                                                                                                                                                                                                                                                                                   |
| <b>Last examination at 31 yo</b> | Decreased frequency of the hemiplegic/dystonic episodes<br><br>Dysarthria<br><br>Tremor between the spells<br><br>Mild ataxia and uncoordination but walks independently<br><br><br><br>Graduated from High School but decreased mental skills                                                                                                                                                                                                                              |

|                         | <b>Patients presenting the R756H mutation</b>                                                                                                                        |                                                                                                  |
|-------------------------|----------------------------------------------------------------------------------------------------------------------------------------------------------------------|--------------------------------------------------------------------------------------------------|
|                         | Female, 5.5 years old                                                                                                                                                | Female, 11.5 years old                                                                           |
| <b>Birth</b>            | Normal                                                                                                                                                               | Normal                                                                                           |
| <b>Development</b>      | Motor milestones and speech slightly delayed by 3-4 months                                                                                                           | Motor milestones and speech acquisition normal                                                   |
| <b>Childhood</b>        | <p>Febrile seizure at 2.5 yo with residual persistent right sided hemiplegia and ataxia</p> <p>Recurrence of seizure at 3 yo, followed by dysarthria, dysphagia.</p> | <p>Febrile seizure at 2 yo</p> <p>First episode of hemiplegia or dystonia at 3.5 yo</p>          |
| <b>Last examination</b> | <p><b>at 3yo</b></p> <p>Right sided hemiplegia</p> <p>Truncal ataxia needing assistance for walking and sitting</p> <p>Poor speech</p>                               | <p><b>at 9.5 yo</b></p> <p>Ataxia and dysmetria</p> <p>Dysarthria</p> <p>Learning disability</p> |
